# Supplementary material for: Pre- and post-sequencing recommendations for functional annotation of human fecal metagenomes
Source: PubMed Central journal article supplement (PMC7041091; doi:10.1186/s12859-020-3416-y), 2020-02-24
Supplement: 12859_2020_3416_MOESM1_ESM.pdf [file 12859_2020_3416_MOESM1_ESM.pdf]

## Figure S1

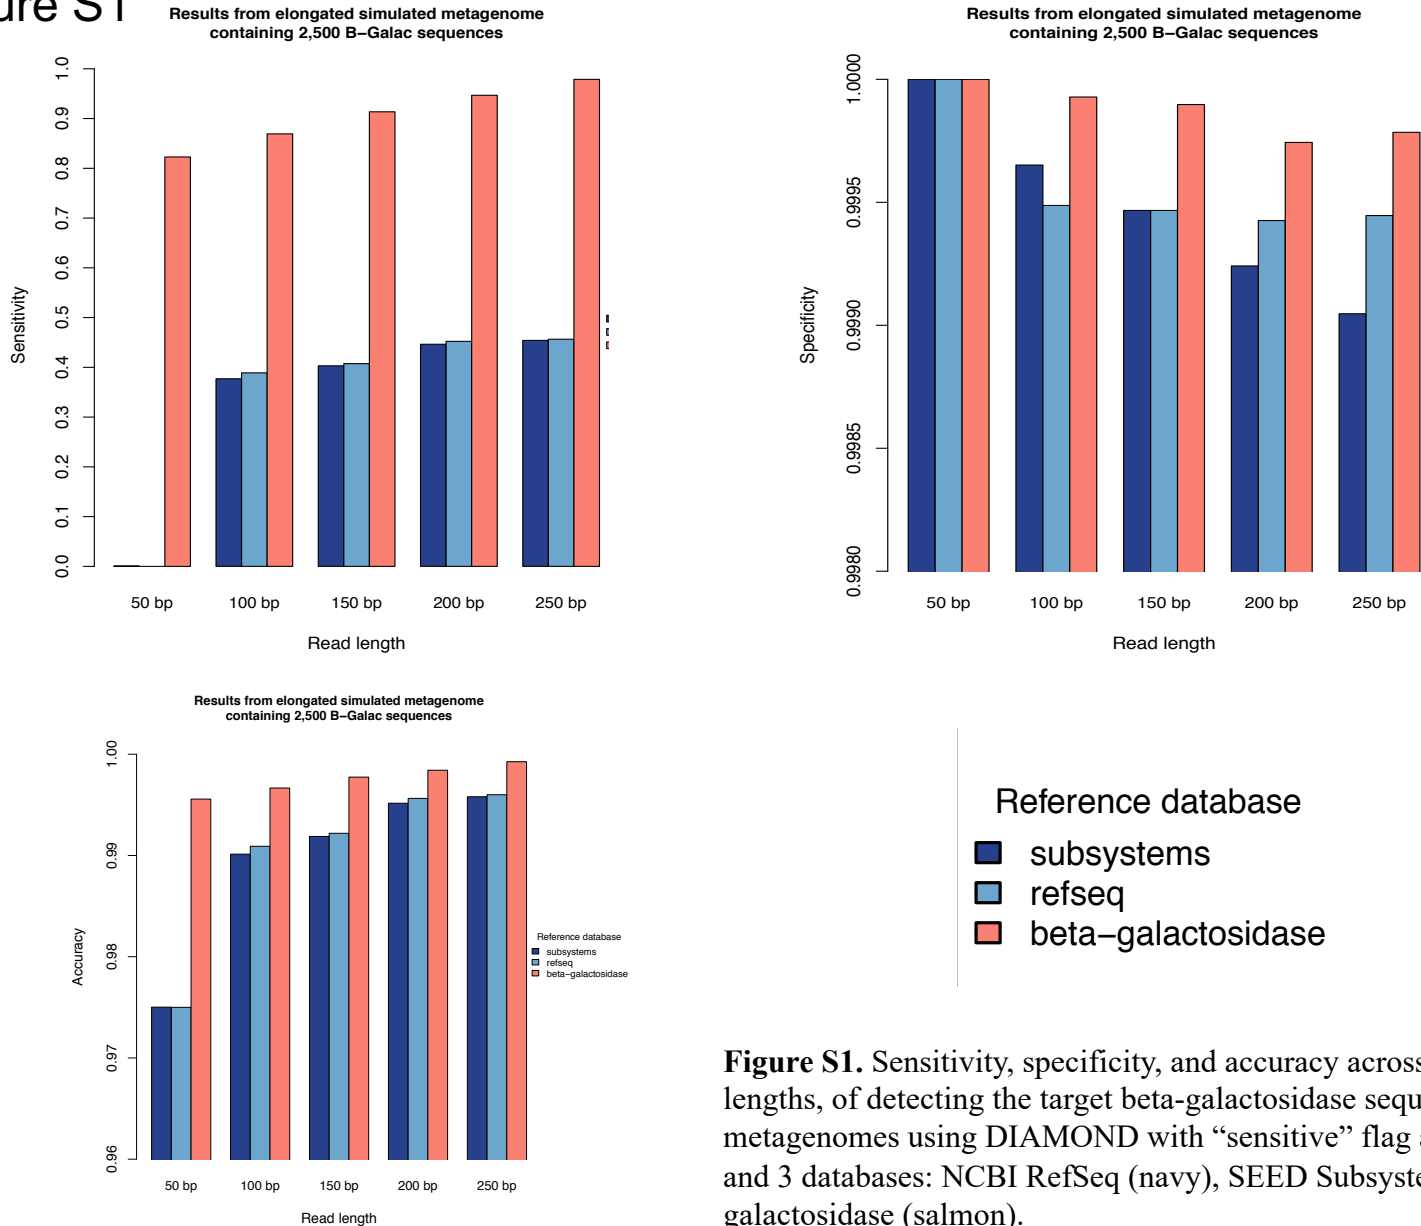

**Figure S1.** Sensitivity, specificity, and accuracy across different read lengths, of detecting the target beta-galactosidase sequence in simulated metagenomes using DIAMOND with “sensitive” flag and default e-value and 3 databases: NCBI RefSeq (navy), SEED Subsystems (blue), and beta-galactosidase (salmon).

Figure S2

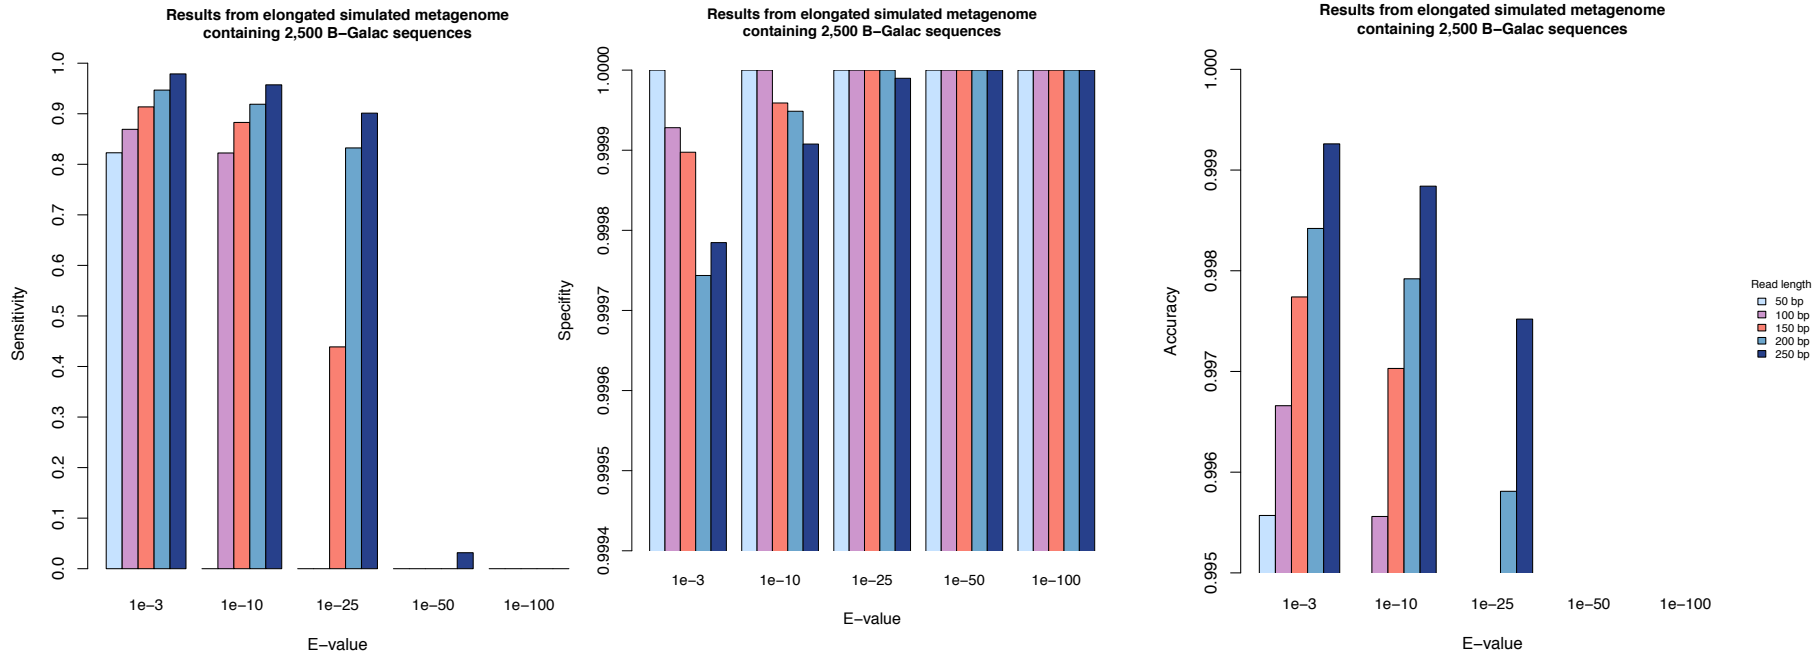

**Figure S2.** Sensitivity, specificity, and accuracy of detection of beta-galactosidase sequences in simulated metagenomes containing 2,500 beta-galactosidase sequences at varying e-value cutoffs and read lengths of 50 bp (light blue), 100 bp (purple), 150 bp (salmon), 200 bp (blue), and 250 bp (navy).

# Figure S3

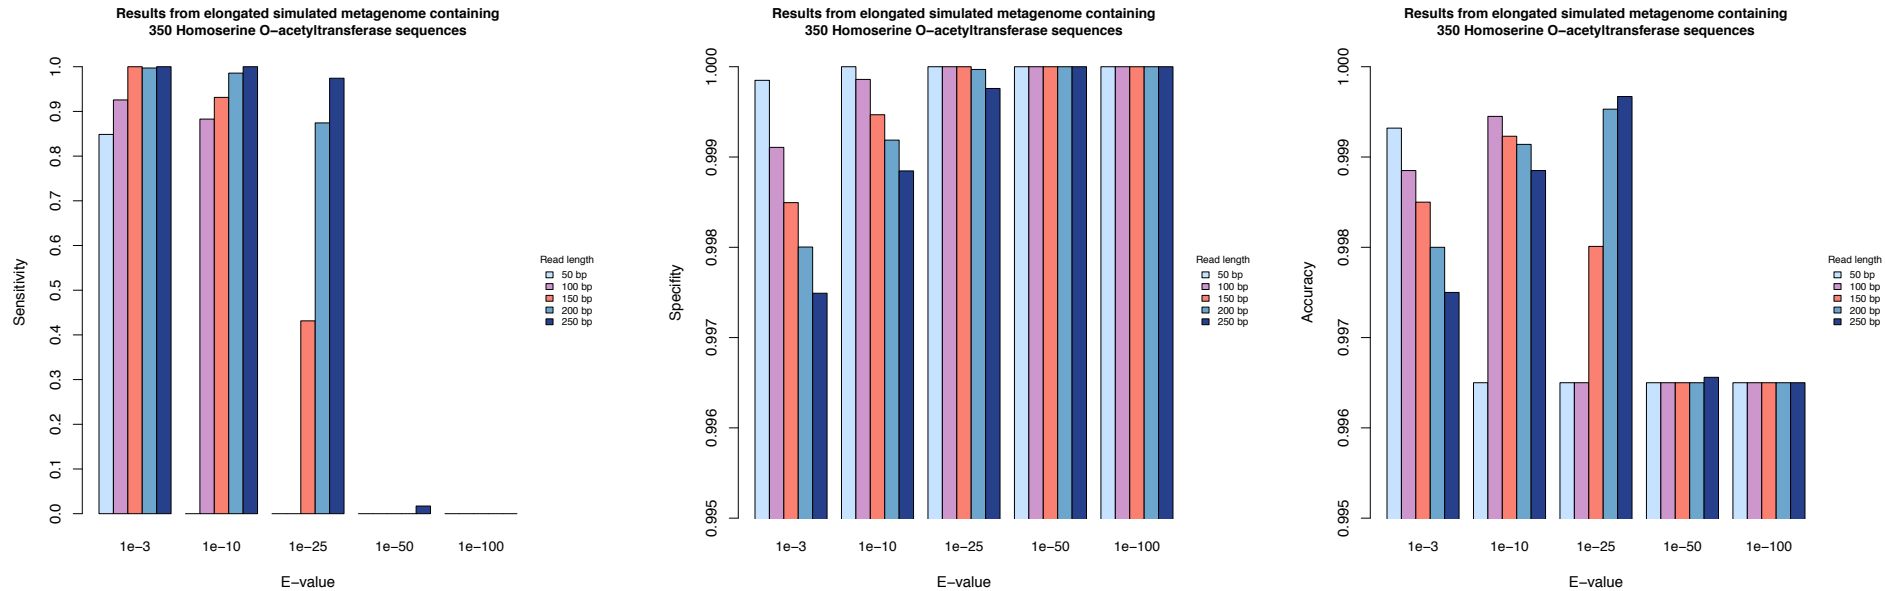

**Figure S3.** Sensitivity, specificity, and accuracy of Homoserine O-acetyltransferase sequence detection in simulated metagenomes containing 350 Homoserine O-acetyltransferase sequences at varying e-value cutoffs and read lengths of 50 bp (light blue), 100 bp (purple), 150 bp (salmon), 200 bp (blue), and 250 bp (navy).

# Figure S4

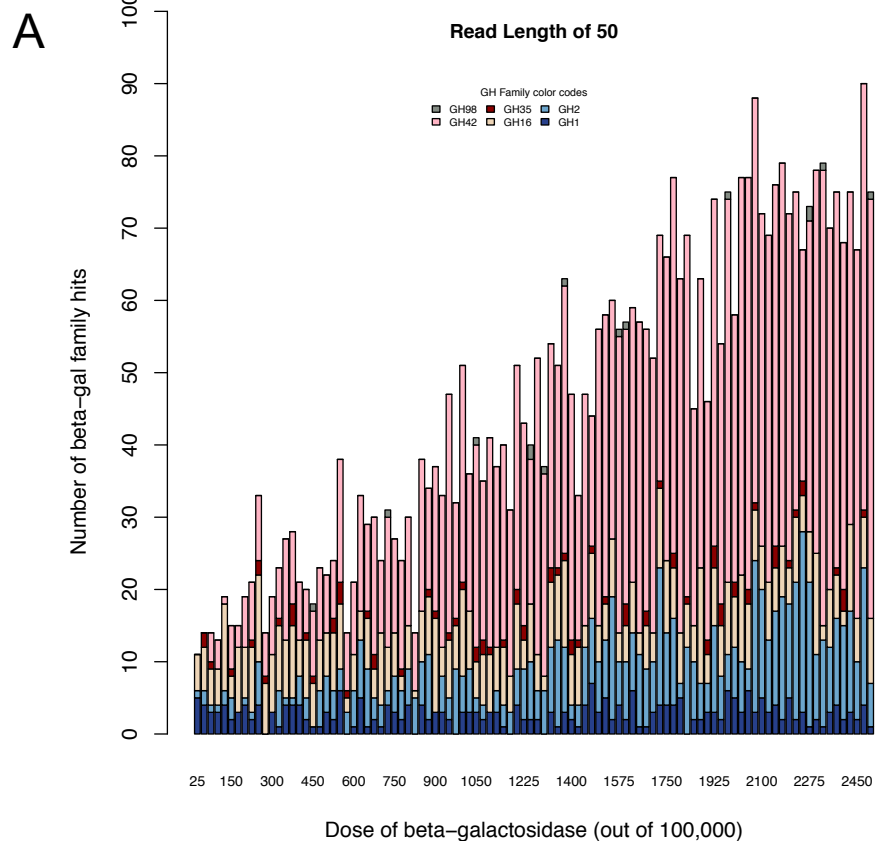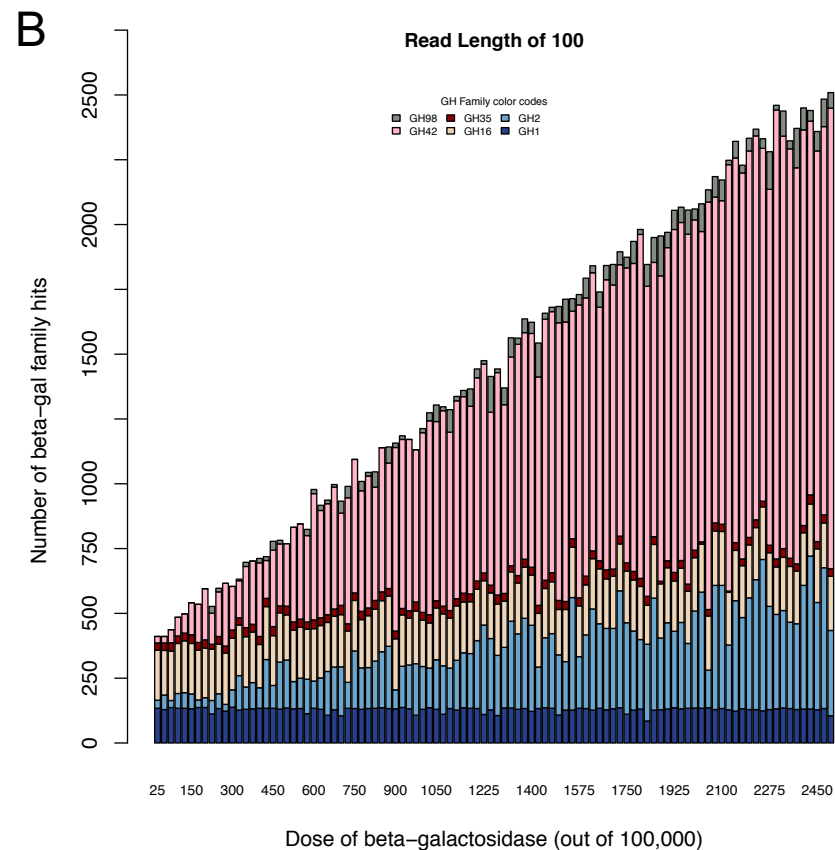

**Figure S4:** CAZy family distributions across varying beta-gal dosages and read lengths of 50 bp (A), 100 bp (B), 150 bp (C), 200 bp (D), and 250 bp (E). Annotations against 7 CAZy families that contain beta-galactosidase were included: GH1(navy), GH2 (blue), GH16 (tan), GH35 (red), GH42 (pink), GH59 (light green only shown in fig 3D-E), and GH98 (grey). andBased on fig 2A, a read length below 100 bp is inadequate for functional annotation. Generally as read length increases, the overall number annotations to CAZy beta-galactosidase..

Figure S4 (continued)

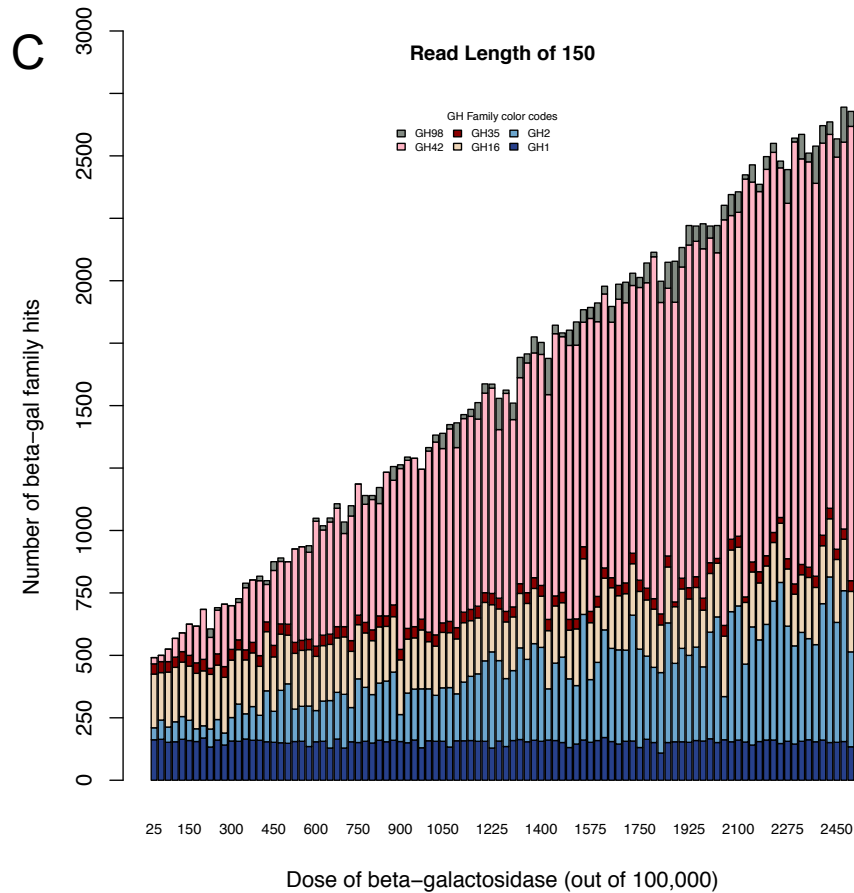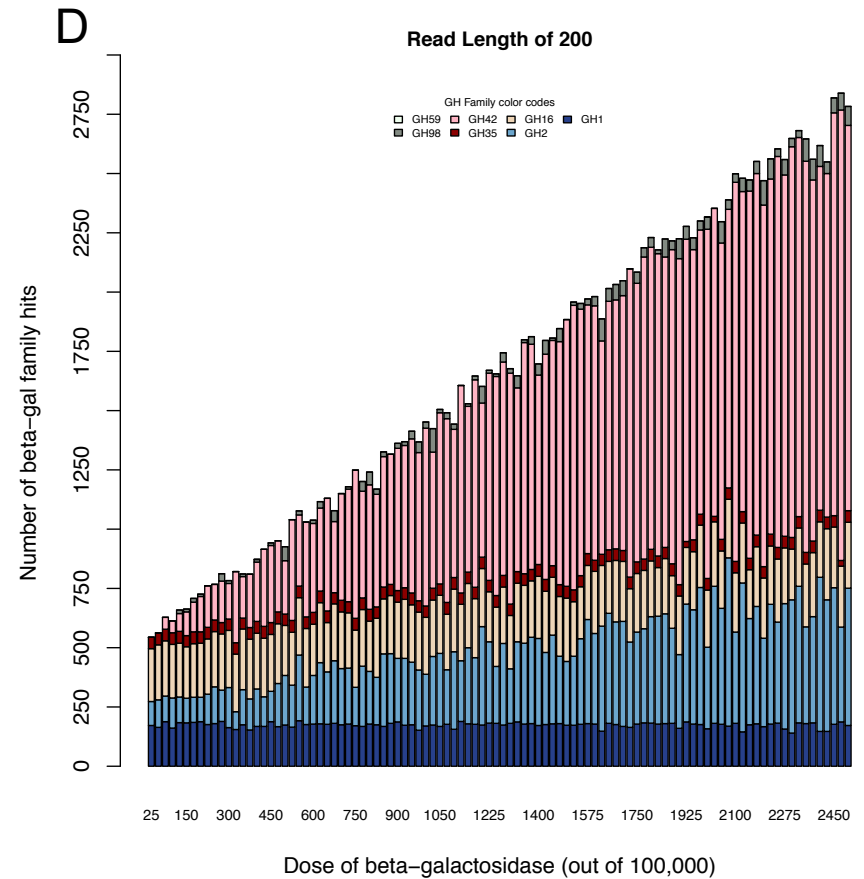

families increases. However, Glycoside Hydrolase Family 1 shows an insignificant increase in annotations with increasing dosages, likely because results include only entire CAZy families, not individual proteins, and matched proteins that are not beta-galactosidase, but in the same family

Figure S4 (continued)

E

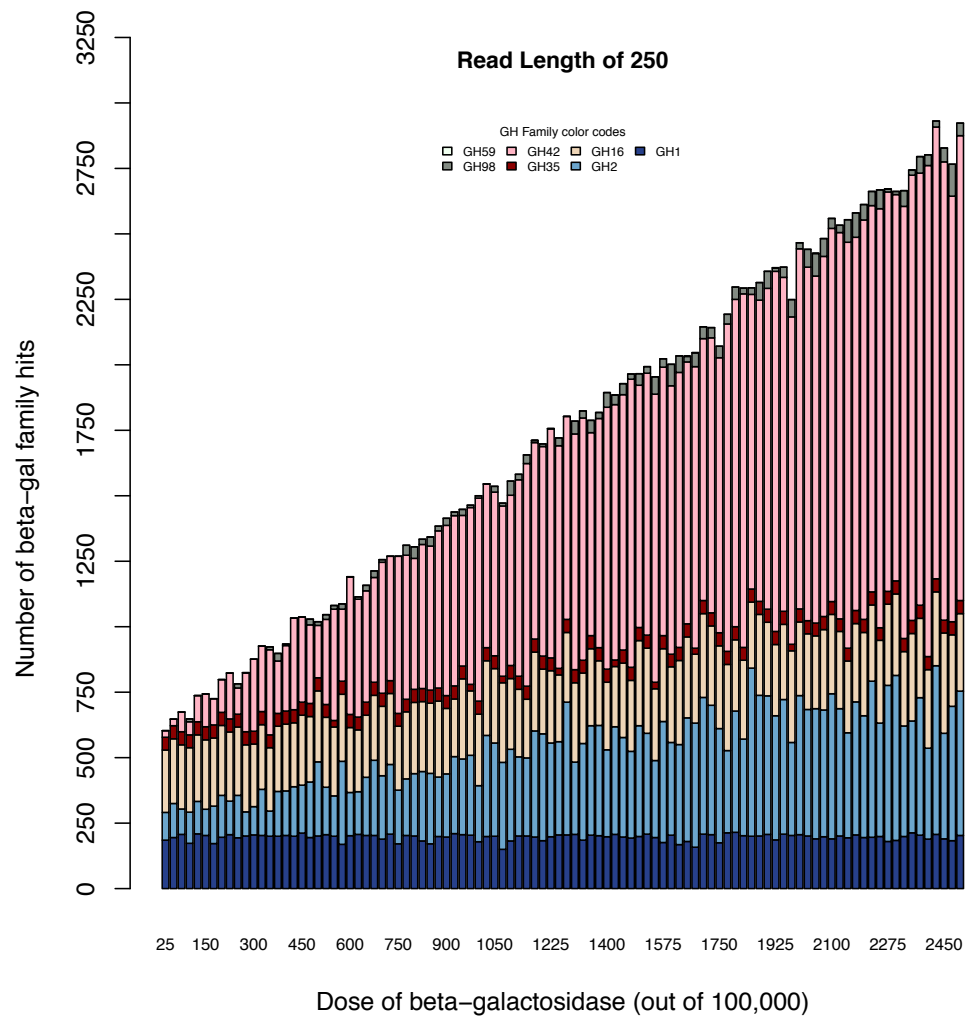

Figure S5

Infant metagenome DMDT001S

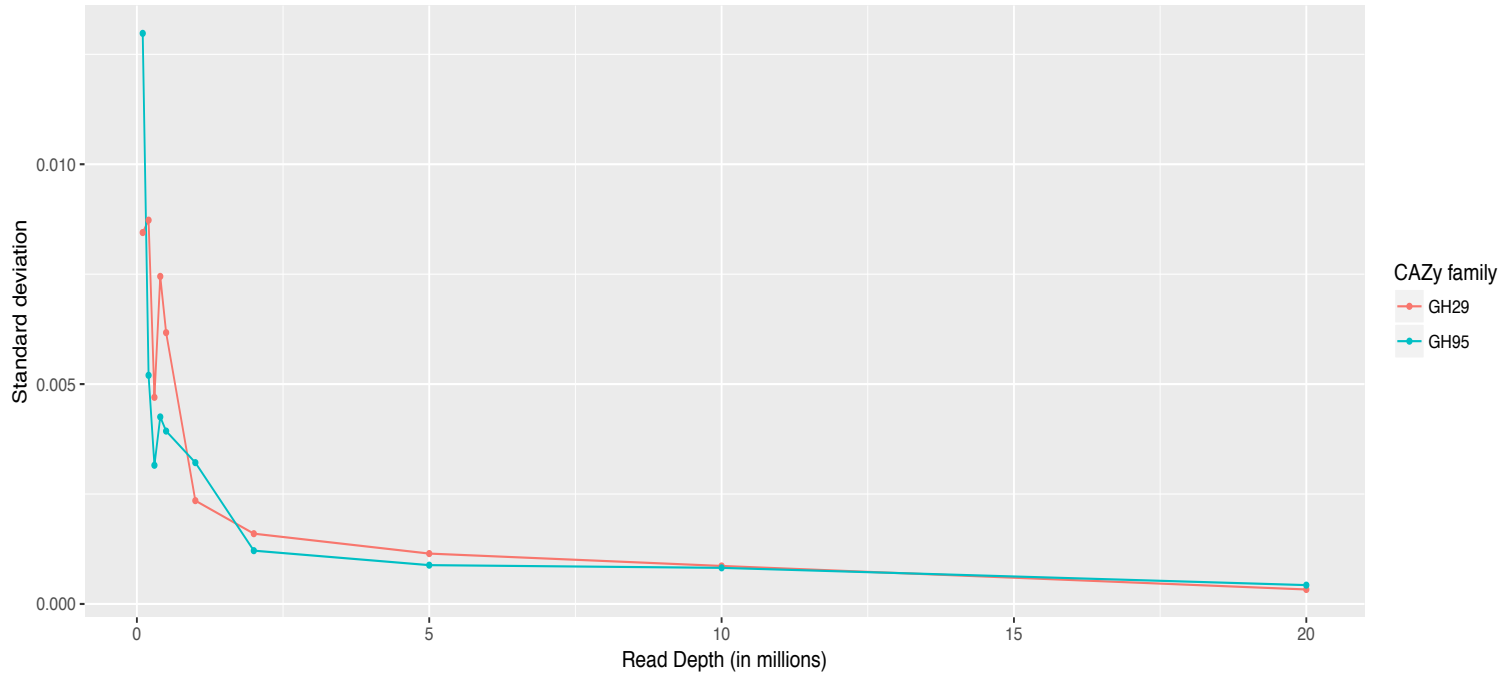

Figure S5: Standard deviation of 10 subsampled metagenomes' annotations against two fucosidase families of the CAZy database for each read depth from an infant metagenome of 30 million merged reads.
